# Supplementary material for: The Local and Electronic Structure Study of LuxGd1−xVO4 (0 ≤ x ≤ 1) Solid Solution Nanocrystals
Source: MDPI journal article supplement (doi:10.3390/nano13020323), 2023-01-12
Supplement: s1 [file s1]

## Supporting information for

# The Local and Electronic Structure Study of $\text{Lu}_x\text{Gd}_{1-x}\text{VO}_4$ ( $0 \leq x \leq 1$ ) Solid Solution Nanocrystals

Yang Chen <sup>1</sup>, Ziqing Li <sup>2</sup>, Nianjing Ji <sup>3</sup>, Chenxi Wei <sup>4\*</sup>, Xiulan Duan <sup>1\*</sup>, Huaidong Jiang <sup>1,4\*</sup>

<sup>1</sup> State Key Laboratory of Crystal Materials, Institute of Crystal Materials, Shandong University, Jinan 250100, China

<sup>2</sup> Institute of Optoelectronics, Fudan University, Shanghai 200433, China

<sup>3</sup> School of Materials Science & Engineering, Shandong Jianzhu University, Jinan 250101, China

<sup>4</sup> Center for Transformative Science, ShanghaiTech University, Shanghai 201210, China

\*Correspondence:

weichx@shanghaitech.edu.cn (C.W.);

xlduan@sdu.edu.cn (X.D.);

jianghd@shanghaitech.edu.cn (H.J.).

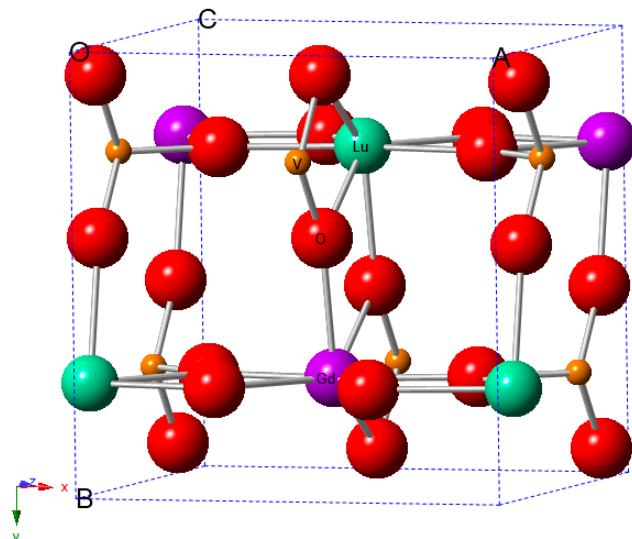

**Figure S1.** Unit cell model of  $\text{Lu}_{0.5}\text{Gd}_{0.5}\text{VO}_4$ .

**Table S1.** Rietveld refined cell parameters and R factors for  $\text{Lu}_x\text{Gd}_{1-x}\text{VO}_4$  solid solutions.

| $x_{\text{calc}}$ | $a$ (Å) | $c$ (Å) | $V$ (Å <sup>3</sup> ) | Bragg R-factor (%) | Rp (%) | Rwp (%) |
|-------------------|---------|---------|-----------------------|--------------------|--------|---------|
| 0                 | 7.21287 | 6.35552 | 330.649               | 5.25               | 5.29   | 6.64    |
| 0.1               | 7.19318 | 6.34168 | 328.130               | 3.48               | 4.84   | 6.18    |
| 0.3               | 7.15467 | 6.31936 | 323.484               | 8.87               | 5.68   | 7.24    |
| 0.5               | 7.12131 | 6.29779 | 319.380               | 3.40               | 5.91   | 7.47    |
| 0.7               | 7.08135 | 6.27193 | 314.509               | 3.39               | 6.03   | 7.81    |
| 0.9               | 7.04636 | 6.25044 | 310.342               | 4.85               | 7.54   | 9.53    |
| 1                 | 7.02852 | 6.23600 | 308.059               | 8.11               | 9.85   | 12.8    |

**Table S2.** Fitting results of the nearest and next nearest neighbor coordination shells of the FT-EXAFS spectra of  $\text{Lu}_x\text{Gd}_{1-x}\text{VO}_4$  at the Gd L<sub>3</sub>-edge, the coordination number ( $N$ ) was fixed.

| $x$ | Gd···O1.1   |                              |                   | Gd···O1.2   |                              |  | Gd···O      |  |  | Gd···V      |                   |                              | $S_0^2$ | R-factor (%) |
|-----|-------------|------------------------------|-------------------|-------------|------------------------------|--|-------------|--|--|-------------|-------------------|------------------------------|---------|--------------|
|     | $R$ (Å)     | $\sigma^2$ (Å <sup>2</sup> ) | $\Delta E_0$ (eV) | $R$ (Å)     | $\sigma^2$ (Å <sup>2</sup> ) |  | $R$ (Å)     |  |  | $R$ (Å)     | $\Delta E_0$ (eV) | $\sigma^2$ (Å <sup>2</sup> ) |         |              |
| 0   | 2.339±0.025 | 0.0054                       | 3.6               | 2.457±0.029 | 0.0069                       |  | 2.398±0.027 |  |  | 3.201±0.013 | 7.2               | 0.0035                       | 1.0     | 0.83         |
| 0.1 | 2.328±0.017 | 0.0045                       | 3.2               | 2.455±0.021 | 0.0057                       |  | 2.392±0.019 |  |  | 3.197±0.012 | 7.0               | 0.0035                       | 1.0     | 0.70         |
| 0.3 | 2.326±0.015 | 0.0044                       | 3.4               | 2.454±0.021 | 0.0060                       |  | 2.390±0.018 |  |  | 3.200±0.012 | 8.4               | 0.0036                       | 1.0     | 0.83         |
| 0.5 | 2.301±0.014 | 0.0036                       | 2.1               | 2.444±0.016 | 0.0040                       |  | 2.372±0.015 |  |  | 3.187±0.012 | 6.3               | 0.0034                       | 1.0     | 0.82         |
| 0.7 | 2.318±0.015 | 0.0034                       | 3.8               | 2.458±0.022 | 0.0050                       |  | 2.388±0.018 |  |  | 3.181±0.014 | 6.6               | 0.0033                       | 1.0     | 1.3          |
| 0.9 | 2.280±0.020 | 0.0028                       | 1.4               | 2.434±0.022 | 0.0020                       |  | 2.357±0.021 |  |  | 3.173±0.023 | 4.9               | 0.0030                       | 1.0     | 1.7          |

**Table S3.** Fitting results of the nearest and next nearest neighbor coordination shells of the FT-EXAFS spectra of  $\text{Lu}_x\text{Gd}_{1-x}\text{VO}_4$  at the Lu L<sub>3</sub>-edges, the coordination number ( $N$ ) was fixed.

| $x$ | Lu···O1.1   |                              |                   | Lu···O1.2   |                              |  | Lu···O      |  |  | Lu···V      |                   |                              | $S_0^2$ | R-factor (%) |
|-----|-------------|------------------------------|-------------------|-------------|------------------------------|--|-------------|--|--|-------------|-------------------|------------------------------|---------|--------------|
|     | $R$ (Å)     | $\sigma^2$ (Å <sup>2</sup> ) | $\Delta E_0$ (eV) | $R$ (Å)     | $\sigma^2$ (Å <sup>2</sup> ) |  | $R$ (Å)     |  |  | $R$ (Å)     | $\Delta E_0$ (eV) | $\sigma^2$ (Å <sup>2</sup> ) |         |              |
| 0.1 | 2.296±0.015 | 0.0032                       | 8.1               | 2.417±0.039 | 0.0093                       |  | 2.356±0.027 |  |  | 3.135±0.012 | 5.1               | 0.0022                       | 0.91    | 2.1          |
| 0.3 | 2.266±0.017 | 0.0048                       | 6.0               | 2.396±0.025 | 0.0079                       |  | 2.331±0.021 |  |  | 3.152±0.012 | 7.8               | 0.0040                       | 0.89    | 0.85         |
| 0.5 | 2.263±0.010 | 0.0049                       | 5.8               | 2.397±0.018 | 0.0087                       |  | 2.330±0.014 |  |  | 3.153±0.008 | 8.5               | 0.0039                       | 0.93    | 0.77         |
| 0.7 | 2.251±0.008 | 0.0045                       | 5.3               | 2.394±0.013 | 0.0076                       |  | 2.322±0.011 |  |  | 3.149±0.008 | 8.7               | 0.0042                       | 0.94    | 0.61         |
| 0.9 | 2.244±0.009 | 0.0048                       | 5.1               | 2.386±0.016 | 0.0077                       |  | 2.315±0.012 |  |  | 3.136±0.008 | 7.5               | 0.0040                       | 0.92    | 0.77         |
| 1   | 2.242±0.006 | 0.0045                       | 5.0               | 2.386±0.012 | 0.0076                       |  | 2.314±0.009 |  |  | 3.134±0.006 | 7.7               | 0.0036                       | 0.91    | 0.42         |

**Table S4.** Average distances from the dodecahedron central atoms to the first and second coordination shells and the dodecahedron distortion indexes for  $\text{Lu}_x\text{Gd}_{1-x}\text{VO}_4$  solid solutions.

| $x$        | Average distances |             | Dodecahedron distortion index |                  |
|------------|-------------------|-------------|-------------------------------|------------------|
|            | RE...O (Å)        | RE...V (Å)  | GdO <sub>8</sub>              | LuO <sub>8</sub> |
| <b>0</b>   | 2.398±0.027       | 3.201±0.013 | 0.0246                        |                  |
| <b>0.1</b> | 2.388±0.020       | 3.191±0.012 | 0.0266                        | 0.0257           |
| <b>0.3</b> | 2.372±0.019       | 3.186±0.012 | 0.0268                        | 0.0279           |
| <b>0.5</b> | 2.351±0.014       | 3.170±0.010 | 0.0301                        | 0.0288           |
| <b>0.7</b> | 2.342±0.013       | 3.159±0.010 | 0.0293                        | 0.0308           |
| <b>0.9</b> | 2.319±0.013       | 3.140±0.010 | 0.0327                        | 0.0307           |
| <b>1</b>   | 2.314±0.009       | 3.134±0.006 |                               | 0.0311           |

The polyhedral distortion index was calculated by  $D = \frac{1}{n} \sum_{i=1}^n \frac{|l_i - l_{av}|}{l_{av}}$  [1].

**Table S5.** Binding energies of characteristic peaks of all component elements and binding energy differences ( $\Delta\text{BE}$ ) between metal and oxygen characteristic peak of  $\text{Lu}_x\text{Gd}_{1-x}\text{VO}_4$  solid solutions.

| $x$                                                               | 0      | 0.2    | 0.4    | 0.5    | 0.6    | 0.8    | 1      |
|-------------------------------------------------------------------|--------|--------|--------|--------|--------|--------|--------|
| O 1s (eV)                                                         | 530.12 | 530.22 | 530.00 | 529.95 | 530.03 | 529.92 | 529.87 |
| V <sup>5+</sup> 2p <sub>3/2</sub> (eV)                            | 517.32 | 517.40 | 517.18 | 517.14 | 517.22 | 517.11 | 517.07 |
| $\Delta\text{BE}$ (O-V) (eV)                                      | 12.80  | 12.82  | 12.82  | 12.81  | 12.81  | 12.81  | 12.80  |
| Lu 4d <sub>5/2</sub> (eV)                                         | -      | 196.76 | 196.41 | 196.40 | 196.36 | 196.24 | 196.13 |
| $\Delta\text{BE}$ (O-Lu) (eV)                                     | -      | 333.46 | 333.59 | 333.55 | 333.67 | 333.68 | 333.74 |
| $\Delta\text{BE}$ (Lu 4d <sub>3/2</sub> -4d <sub>5/2</sub> ) (eV) |        | 9.89   | 9.92   | 9.84   | 9.93   | 9.93   | 9.93   |
| Gd 4d (eV)                                                        | 141.66 | 141.79 | 141.47 | 141.55 | 141.50 | 141.48 | -      |
| $\Delta\text{BE}$ (O-Gd) (eV)                                     | 388.46 | 388.43 | 388.53 | 388.40 | 388.53 | 388.44 | -      |

1. Baur, W.H. The geometry of polyhedral distortions. Predictive relationships for the phosphate group. *Acta Crystallogr. Sect. B* **1974**, *30*, 1195-1215.
